# Supplementary material for: The Oxidant–Antioxidant Equilibrium and Inflammatory Process Indicators after an Exercise Test on the AlterG Antigravity Treadmill in Young Amateur Female Athletes
Source: PubMed Central journal article supplement (PMC5889893; doi:10.1155/2018/3484159), 2018-03-25
Supplement: 3484159.f1.pdf [file 3484159.f1.pdf]

Table 1. Pearson's linear correlations demonstrated between parameters investigated in the study ( $p < 0.05$ ).

| Study time point                      | Correlation (r-Pearson's coefficient) |                            |
|---------------------------------------|---------------------------------------|----------------------------|
|                                       | AlterG                                | Classic                    |
| Measurement 1 (before exercise)       | Vit. E vs. GPx (-0.51)                | TBARSer vs. vit. A (-0.83) |
|                                       | Vit. E vs. CTS D (-0.63)              | CAT vs. vit. E (-0.68)     |
|                                       | TBARSer vs. GPx (0.51)                | CDer vs. vit. E (-0.68)    |
|                                       |                                       | AcP vs. AAT (0.68)         |
| Measurement 2 (30 min after exercise) | GPx vs. CTS D (0.47)                  | CAT vs. AAT (0.72)         |
|                                       | AAT vs. CTS D (0.49)                  |                            |
| Measurement 3 (24 h after exercise)   | TBARSer vs. vit. A (-0.55)            | TBARSer vs. SOD (0.77)     |
|                                       | TBARSer vs. SOD (0.50)                |                            |
|                                       | TBARSer vs. GPx (0.57)                |                            |
|                                       | TBARSer vs. AcP (0.62)                |                            |
|                                       | TBARSer vs. AAT (0.65)                |                            |
|                                       | TBARSer vs. CTS D (0.66)              |                            |
|                                       | SOD vs. GPx (0.55)                    |                            |
|                                       | SOD vs. CTS D (0.53)                  |                            |
|                                       | GPx vs. AcP (0.51)                    |                            |
|                                       | AcP vs. vit. A (-0.49)                |                            |
|                                       | CDer vs. ASA (0.59)                   |                            |
|                                       | CDer vs CTS D (0.55)                  |                            |

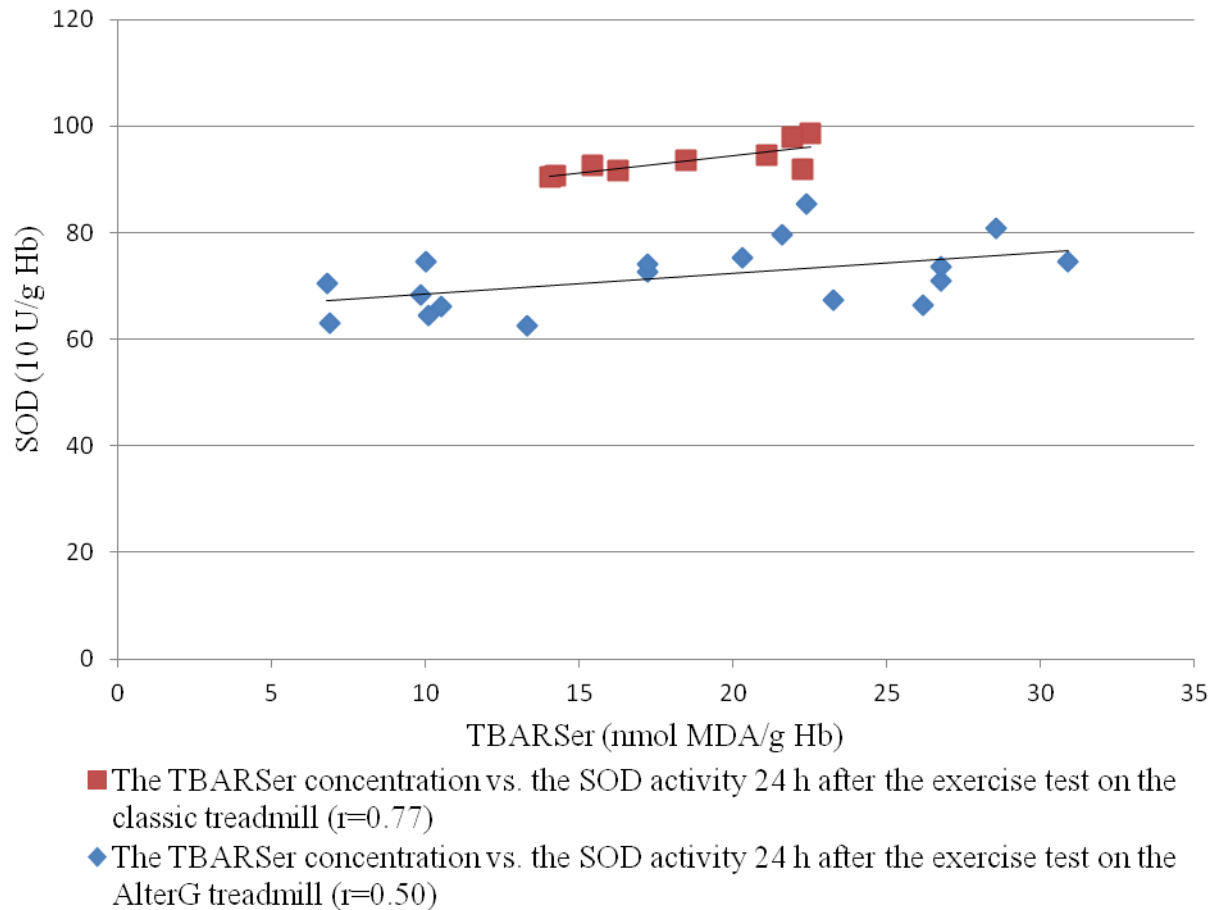

Figure 1. Statistically significant Pearson's correlation coefficients ( $r$ ) between the TBARS concentration and the SOD activity in erythrocytes of peripheral blood in healthy female amateur volleyball players aged approx. 15 years after the 30-min running test on the anti-gravity (AlterG) and classic treadmills. TBARS, thiobarbituric acid reactive substances; SOD, superoxide dismutase; MDA, malondialdehyde; Hb, hemoglobin.
